# Supplementary material for: The chemical modification of liposome surfaces via a copper-mediated [3 + 2] azide–alkyne cycloaddition monitored by a colorimetric assay
Source: Royal Society of Chemistry journal article supplement (doi:10.1039/b606930d), 2006-01-01
Supplement: b606930d.pdf [file b606930d.pdf]

# The chemical modification of liposome surfaces via a copper-mediated [3+2] azide-alkyne cycloaddition monitored by a colorimetric assay

*Silvia Cavalli, Alicia René Tipton, Mark Overhand and Alexander Kros\**

Leiden Institute of Chemistry, Leiden University, P.O. Box 9502, 2300 RA Leiden, The  
Netherlands, Fax: +31 715274397, Email: A.Kros@chem.leidenuniv.nl

## Supporting Information

|                  |                                                                                              |     |
|------------------|----------------------------------------------------------------------------------------------|-----|
| <b>S1</b>        | Experimental section                                                                         | p 2 |
| <b>Scheme S2</b> | Synthetic scheme for the preparation<br>of DOPE-COCH $\equiv$ CH <b>1</b>                    | p 6 |
| <b>Scheme S3</b> | Synthetic scheme for the preparation<br>of N <sub>3</sub> -Lys(NBD)-NH <sub>2</sub> <b>2</b> | p 6 |
| <b>Figure S4</b> | Liposome Diameters                                                                           | p 7 |
| <b>Figure S5</b> | Images of the color change                                                                   | p 8 |
| <b>Figure S6</b> | HPLC data                                                                                    | p 8 |

## S1. Experimental section

**General materials and methods.** All reagents and solvents were commercial products purchased from Aldrich or Biosolve ltd and used as received. Lipids were purchased from Lipoid and Avanti Polar Lipids, Rink Amide resin (0.78 mmol/g), PyBOP and FmocLys(Mtt)-OH were purchased from Novabiochem. LC-MS spectra were recorded on a JASCO RP-HPLC system, with simultaneous UV detection at 214 and 254 nm, coupled to a PE/SCIEX API 165 mass spectrometer equipped with a custom-made electrospray interface (ESI). HPLC analysis was performed on a Shimadzu system connected to a ELSD-detector. For LC-MS an analytical Vydac C4 column (Grace Vydac, 4.6 mm x 250 mm, 5  $\mu$ m particle size, flow 1 ml/min) was employed. Buffers: A: 25% (v/v) H<sub>2</sub>O in CH<sub>3</sub>OH; B: CH<sub>3</sub>CN and C: 1% (v/v) TFA in CH<sub>3</sub>OH. A linear gradient with increasing percentage of B was applied in 5 column volumes (CV) and 10% of buffer C was used. For RP-HPLC a preparative Vydac C4 column (Grace Vydac, 22 mm x 250 mm, 10  $\mu$ m particle size, flow 25 ml/min) and the same buffer system used for LC-MS were employed. For HPLC an analytical Alltech Silica Column (Alltech, Altima Silica Column 250 x 4.6 mm, Silica 5  $\mu$ m particle size, flow 1 ml/min) was employed. Buffers: A: 60% CHCl<sub>3</sub>, 34.5% CH<sub>3</sub>OH, 5% H<sub>2</sub>O, 0.5% ammonia (25%). B: CH<sub>3</sub>OH. A linear gradient of 75  $\rightarrow$  0% B was applied in 5 CV. Milli-Q water with a resistance of more than 18.2 M $\Omega$ /cm was provided by a Millipore Milli-Q filtering system with filtration through a 0.22  $\mu$ m Millipak filter. FRET spectra (exciting  $\lambda$  = 470 nm) were measured with a Luminescence Spectrometer LS 55, Perkin Elmer Instruments and UV spectra ( $\lambda$  = 472 nm) were recorded using a Varian Cary 3 Bio. The size distributions of the liposome solutions was measured by Photon Correlation Spectroscopy (PCS) using a Zetasizer 3000 HS<sub>A</sub>, Melvern Instruments. Temperature = 25.0 °C, Viscosity = 0.890 cP; Angle = 90.0 deg RI medium = 1.33; RI particle 1.50 + Abs. 0.00.

$^1\text{H}$ -NMR and  $^{13}\text{C}$ -NMR spectra were measured with a Bruker AC-200 (200 and 50.1 MHz respectively). Chemical shifts are reported in ppm downfield from internal tetramethylsilane (0.00 ppm). In the case of the  $^{13}\text{C}$  spectra, the solvent peak was used as a reference ( $\text{CDCl}_3$ : 77.7 ppm).

Abbreviations used are s = singlet, d = doublet, dd = doublet of doublets, m = multiplet, br = broad.

**1,2-Dioleoyl-sn-Glycero-3-Phosphoethanolamine-*N*-prop-2'-ynamide (DOPE-COCH=CH 2).**

1,2-Dioleoyl-sn-Glycero-3-Phosphoethanolamine (DOPE) (1.49 g, 2 mmol) in  $\text{CH}_2\text{Cl}_2$  (10 ml) was treated dropwise with a preactivated solution ( $0^\circ\text{C}$ ) of propiolic acid (3 mmol, 0.2 ml) and *N*-(3-Dimethylaminopropyl)-*N'*-ethylcarbodiimide (EDC, 3 mmol, 288 mg) in  $\text{CH}_2\text{Cl}_2$  (5 ml). After stirring for 20 hrs at room temperature the reaction mixture was again dropwise treated with a preactivated solution ( $0^\circ\text{C}$ ) of propiolic acid (3 mmol, 0.2 ml) and *N*-(3-Dimethylaminopropyl)-*N'*-ethylcarbodiimide (EDC, 3 mmol, 288 mg) in  $\text{CH}_2\text{Cl}_2$  (5 ml). After a total of 40 hrs, TLC analysis revealed complete conversion. The mixture was concentrated under reduced pressure and purified by silica gel column chromatography (100/0  $\rightarrow$  85/10m/v  $\text{CH}_2\text{Cl}_2/\text{CH}_3\text{OH}$ ). Evaporation of the solvents yielded 1.52 g (1.9 mmol, 95%) of product as a "sticky" foam. Finally, the product was purified by RP-HPLC using a linear gradient of 0  $\rightarrow$  90% B in 5 CV. ESI-MS:  $R_t$  14.4 min,  $m/z$  = 796.8  $[\text{M}+\text{H}]^+$ ,  $m/z$  = 818.7  $[\text{M}+\text{Na}]^+$ ,  $m/z$  = 1592.6  $[2\text{M}+\text{H}]^+$ ;  $m/z$  = 604.  $^3\text{H}$  NMR (200 MHz,  $\text{CDCl}_3$ ,  $\delta$ ): 7.8 (br, 1H, NH), 5.4 (m, 5H, =CH and CH glycerol), 4.5-4.4 (m, 1H,  $\text{CH}_A$  glycerol), 4.2-4.0 (m, 5H,  $\text{CH}_B$  glycerol,  $\text{CH}_{A'B'}$  glycerol,  $\text{CH}_2\text{O}$ ), 3.7-3.4 (m, 2H,  $\text{CH}_2\text{N}$ ), 3.0-2.9 (m, 2H,  $\equiv\text{CH}$ ), 2.7-2.5 (m, 4H,  $\text{CH}_2$  succinyl), 2.4-2.3 (m, 4H,  $\text{CH}_2\text{CO}$  oleoyl), 2.1-1.9 (m, 8H,  $\text{CH}_2\text{CH}=\text{CH}$ ), 1.7-1.5 (m, 4H,  $\text{CH}_2\text{CH}_2\text{CO}$  oleoyl), 1.4-1.2 (m, 49H,  $\text{CH}_2$  oleoyl,  $\text{CH}_3$  TEA), 1.0-0.8 (m, 6H,  $\text{CH}_3$  oleoyl).  $^{13}\text{C}$  APT NMR (50.1 MHz,  $\text{CDCl}_3$ ,  $\delta$ ): 173.6 (CO), 153.1 ( $\equiv\text{CH}$ ), 129.7, 129.4 (=CH), 70.2 (CH glycerol), 64.2, 63.6, 62.4 ( $\text{CH}_2$  glycerol,  $\text{CH}_2\text{O}$ ), 40.2 ( $\text{CH}_2\text{N}$ ), 33.8-22.4 ( $\text{CH}_2$  oleoyl), 13.8 ( $\text{CH}_3$  oleoyl). IR (thin film from  $\text{CH}_2\text{Cl}_2$ ,  $\text{cm}^{-1}$ ): 3251 (w, NH stretch, Amide A band), 3008 ( $\text{CH}_3$  anti-symmetric stretch), 2923 ( $\text{CH}_2$  anti-symmetric stretch), 2852 ( $\text{CH}_2$  symmetric stretch), 2109

# Supplementary Material (ESI) for Chemical Communications  
# This journal is (c) The Royal Society of Chemistry 2006

(CH $\equiv$ CH stretch), 1736 (C=O stretch), 1652 (C=O stretch, Amide I band), 1538 (coupled NH deformation and C-N stretch, Amide II band).

**General protocol for the preparation of small unilamellar liposomes.**

A lipid mixture consisting of 50 mol% of DOPE-COCH=CH (1), 1 mol% of DOPE-LR and 49 mol% of DOPC was homogeneously dissolved in CHCl<sub>3</sub> (2 ml). The solvent was evaporated under a flow of N<sub>2</sub> and then under vacuum for 10 min. Next, the lipid film was hydrated for 1 h at room temperature with milli-Q water (total lipid concentration 1 mM). The samples were vortexed resulting in a turbid suspension and sonicated for 1 h until a clear solution appeared. The size of the particles was measured by Photon Correlation Spectroscopy (PCS).

**Procedure for the “click” reaction.**

Fmoc protected Rink Amide resin (0.78 mmol/g, 0.25 mmol, 321 mg) was washed with DCM (15 ml x 3) and NMP (15 ml x 3), followed by removal of the Fmoc group using 20% piperidine in NMP (15 ml x 1 min x 1, 15 ml x 2 min x 2) and washing with NMP (15 ml x 3). *N*- $\alpha$ -Fmoc-*N*- $\epsilon$ -4-methyltrityl-Lys-OH (Fmoc-Lys(Mtt)-OH, 625 mg, 1 mmol, 4 equiv.) in NMP (10 ml) was preactivated with benzotriazole-1-yl-oxy-tris-pyrrolidino-phosphonium hexafluorophosphate (PyBOP, 4 equiv.)/diisopropylethylamine (DIPEA, 8 equiv.) for 2 min and added to the resin. The reaction vessel was shaken for 2 hrs, then the resin was washed with NMP (15 ml x 3) and the Fmoc group removed as described above. Diazo transfer was performed on the solid support,<sup>1</sup> using an excess of triflyl azide (5 mmol, 20 equiv.) in DCM (23 ml) in the presence of a catalytic amount of CuSO<sub>4</sub>·5H<sub>2</sub>O (5 mg, 20  $\mu$ mol, 0.8 equiv.) in MeOH (1 ml). The reaction mixture was shaken for 16 hrs at room temperature. After the Kaiser test confirmed completeness of the diazo transfer, the resin was washed first with NMP (15 ml x 3) and subsequently with 0.5% DIPEA in NMP (15 ml x 3), 0.05 M diethyldithiocarbamic acid sodium salt in NMP (15 ml x 3), NMP (15 ml x 5) and finally with DCM (15 ml x 3).

The methyltrityl (Mtt) group was deprotected by rinsing the resin with 10 ml of DCM/triisopropylsilane (TIS)/trifluoroacetic acid (TFA) 94/5/1 v/v over a period of 2 min (3x) followed by washing with DCM (15 ml x 4) and dry THF (15 ml x 3). A mixture of NBD-Cl (200

mg, 1 mmol, 4 equiv.) and 0.5% DIPEA in dry THF (20 ml) was added to the resin and shaken for 16 hrs at room temperature. <sup>2</sup> The dark brown resin was rinsed in THF (15 ml x 3), NMP (15 ml x 3) and DCM (15 ml x 3). The *N*- $\alpha$ -azido-Lys(NBD) was cleaved from the solid support by treatment with 10 ml of TFA/H<sub>2</sub>O 90/10 v/v for 10 min (3x) at room temperature. After filtration of the resin, the TFA solution was concentrated under reduced pressure to yield a dark brown oil that was directly used in the next step. 2 equiv. (relative to DOPE-COCH $\equiv$ CH **1**) of crude N<sub>3</sub>-Lys(NBD)-NH<sub>2</sub> **2** was weight in a vial and dissolved in 1/1 v/v MeOH/CHCl<sub>3</sub> mixture followed by evaporation of the solvents to form a thin film. The vesicle solution (solution **A**) was added to the vial containing **2** and CuBr (0.5 equiv.). Negative control solution **B** did not contain CuBr. The solutions were incubated at 40 °C for 10 min and then under gentile swirling at room temperature. Successively, solutions were dialyzed against water and subsequently lyophilized. The formation of the product was confirmed by LC-MS using the condition described in the general materials and methods. A linear gradient of 40  $\rightarrow$  90% B was applied in 5 CV. LC-MS: R<sub>t</sub> 12.6 min; ESI-MS:  $m/z$  = 1130.7 [M+H]<sup>+</sup>,  $m/z$  = 1152.6 [M+Na]<sup>+</sup>,  $m/z$  = 967.7 [M-NBD+H]<sup>+</sup>,  $m/z$  = 603.9 <sup>3</sup> (DOPE-COCH $\equiv$ CH: R<sub>t</sub> 13.8 min,  $m/z$  = 796.8 [M+H]<sup>+</sup>,  $m/z$  = 818.7 [M+Na]<sup>+</sup>,  $m/z$  = 603.9; <sup>3</sup> DOPE-LR: R<sub>t</sub> 15.5 min,  $m/z$  = 1284.6 [M+H]<sup>+</sup>,  $m/z$  = 1306.6 [M+Na]<sup>+</sup>,  $m/z$  = 603.9 <sup>3</sup> and DOPC: R<sub>t</sub> 16.9 min,  $m/z$  = 786.6 [M+H]<sup>+</sup>,  $m/z$  = 808.6 [M+Na]<sup>+</sup>).

#### **General protocol for the colorimetric assay, FRET and UV measurements.**

Samples (300  $\mu$ L) were taken at several time intervals ( $t$  = 0, 0.5, 1, 2, 4 and 20 hrs) and dialyzed against water. After which FRET (exciting  $\lambda$  = 470 nm) and UV ( $\lambda$  = 472 nm) spectra were measured.

### HPLC analysis.

All samples used in the colorimetric assay were analyzed by HPLC. Standard lipid solutions ( $c = 1$  mg/ml) were used to assign the peaks.  $R_t$  DOPE-LR  $\sim 21$  min;  $R_t$  DOPE-COC $\equiv$ CH  $\sim 22$  min and  $R_t$  DOPC  $\sim 29$  min.

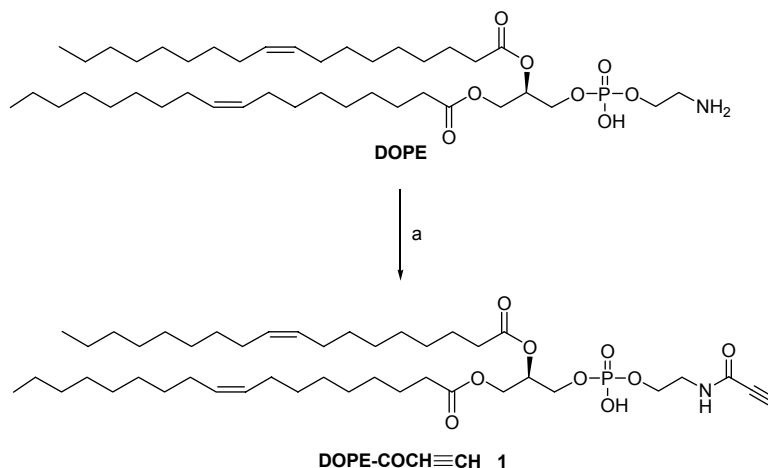

**Scheme S2.** Reagents and conditions: a) CH $\equiv$ CHCOOH (3 equiv.), EDC (3 equiv.) in DCM.

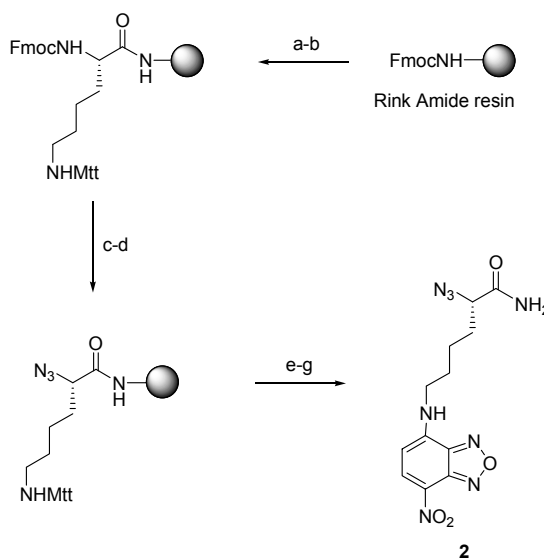

**Scheme S3.** Reagents and conditions: a) 20% piperidine in NMP. b) Fmoc-Lys(Mtt)-OH (4 equiv.) PyBOP (4 equiv.) and DiPEA (8 equiv.) in NMP. c) 20% piperidine in NMP. d) CF<sub>3</sub>SO<sub>2</sub>N<sub>3</sub>, CuSO<sub>4</sub>·5H<sub>2</sub>O (cat.) in DCM. e) 94/1/5 v/v DCM/TFA/TIS. f) NBD-Cl (4 equiv.), 0.5% DiPEA in dry THF. g) 90% TFA in H<sub>2</sub>O.

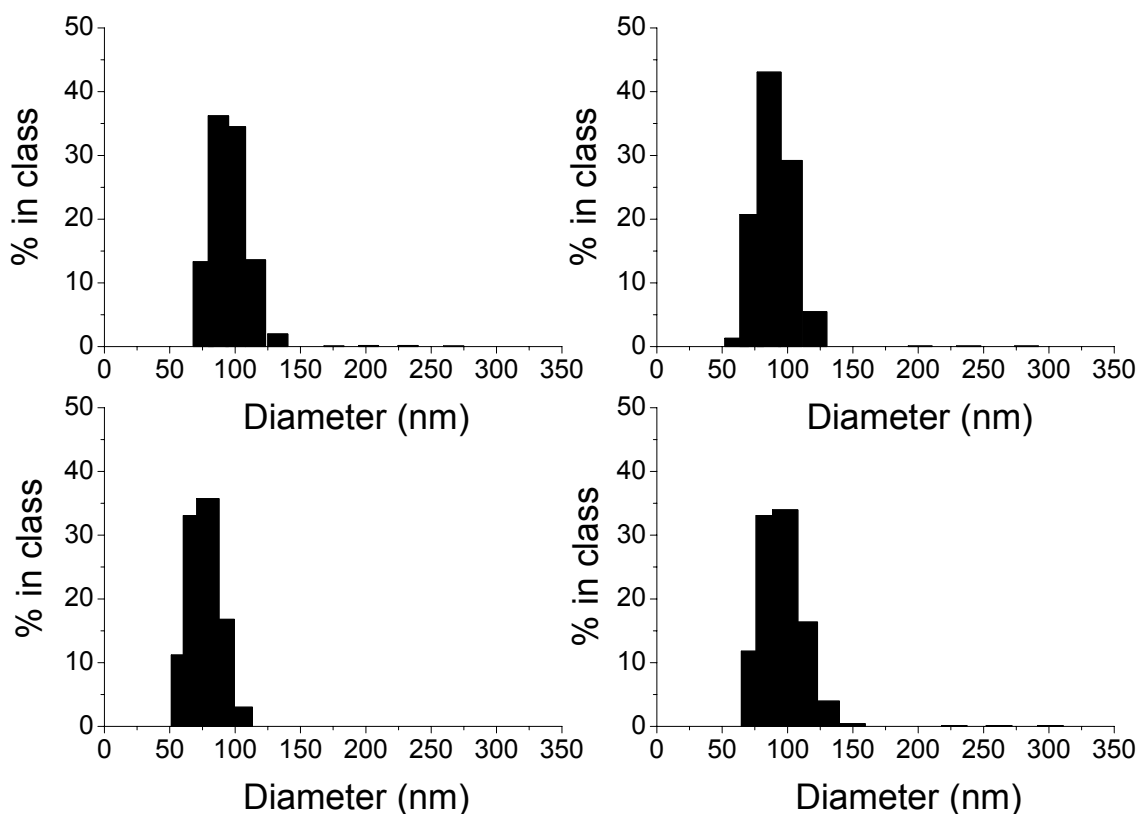

**S4.** Size distribution of liposomes determined by Photon Correlation Spectroscopy (PCS). Vesicle solution **A** (top left) before reaction, cumulant Z average = 122.9 nm; polydispersity = 0.359. (top right) after reaction, cumulant Z average = 133.4 nm; polydispersity = 0.257. Size distributions for negative control solution **B** (bottom left) before addition of  $N_3$ -Lys(NBD)- $NH_2$  **2**, cumulant Z average = 111.5 nm; polydispersity = 0.373. (bottom right) after addition of **2**, cumulant Z average = 129.6 nm; polydispersity = 0.325.



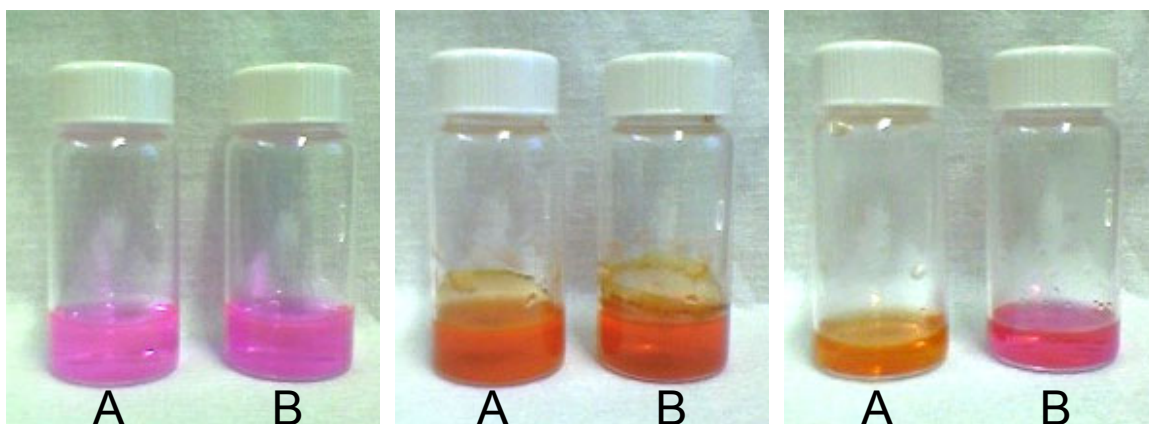

**S5.** Images of the color change (left) before reaction. (middle) during reaction. (right) after reaction.

In all cases A corresponds to the vesicle solution **A** and B to the negative control solution **B**.

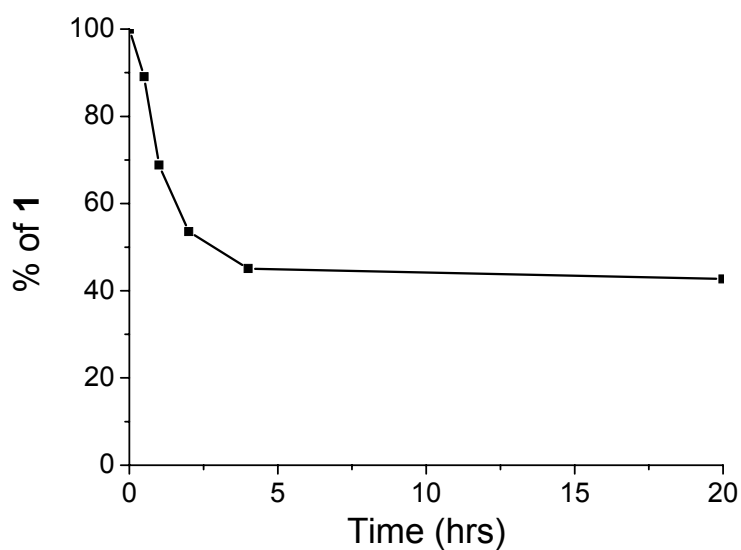

**S6.** Normalized HPLC data. Decrease of DOPE-COCH≡CH (**1**) as a function of time.

## References

- <sup>1</sup> D.T.S. Rijkers, H.H.R. van Vugt, H.J.F. Jacobs and R.M.J. Liskamp, *Tetrahedron Lett.* 2002, **43**, 3657–3660.
- <sup>2</sup> T.W. Jensen, B.-H. Hu, S.M. Delatore, A.S. Garcia, P.B. Messersmith and W.M. Miller, *J. Am. Chem. Soc.* 2004, **126**, 15223-15230.
- <sup>3</sup> Characteristic peak of DOPE, attributed to the loss of the peptide-*N*-succinyl-phosphoethanolamine part. See a) M.L. Gross, *Mass spectrometry in the biological sciences: a tutorial* 1992, Kluwer Academic Publishers, Dordrecht, p.430; b) G.W. Wood, P.A. Tremblay and M. Kates, *Biomed. Mass Spectrom.* 1980, **7**, 11-12.
